# Supplementary material
Source: ML conference proceedings conference paper supplement (https://openaccess.thecvf.com/content/ICCV2023/html/Hu_Multiscale_Representation_for_ICCV_2023_paper.html)
Supplement: Supplementary file 1 [file Hu_Multiscale_Representation_for_ICCV_2023_supplemental.pdf]

# Supplementary Material for “Multiscale Representation for Real-Time Anti-Aliasing Neural Rendering”

## 1. Per-scene Quantitative Results

To perform the comparison on the individual scenes, we report the average error metrics across four scales for each individual scene on **Multiscale-NeRF** in Tab. 1. Our method performs superior rendering quality compared to all the baselines across all the scenes.

| Method                | Average PSNR $\uparrow$ |               |               |               |               |               |               |               |
|-----------------------|-------------------------|---------------|---------------|---------------|---------------|---------------|---------------|---------------|
|                       | chair                   | drums         | figus         | hotdog        | lego          | materials     | mic           | ship          |
| SNeRG [2]             | 31.692                  | 24.916        | 26.838        | 31.402        | 29.724        | 27.024        | 30.467        | 26.009        |
| MobileNeRF [1]        | 29.002                  | 23.363        | 23.821        | 29.871        | 25.914        | 24.337        | 26.400        | 24.900        |
| MobileNeRF [1] w/o SS | 27.890                  | 22.209        | 22.660        | 28.926        | 24.627        | 22.844        | 24.621        | 23.875        |
| Ours                  | <b>32.571</b>           | <b>25.567</b> | <b>29.702</b> | <b>35.096</b> | <b>32.038</b> | <b>27.511</b> | <b>31.672</b> | <b>29.226</b> |

  

| Method                | Average SSIM $\uparrow$ |              |              |              |              |              |              |              |
|-----------------------|-------------------------|--------------|--------------|--------------|--------------|--------------|--------------|--------------|
|                       | chair                   | drums        | figus        | hotdog       | lego         | materials    | mic          | ship         |
| SNeRG [2]             | 0.960                   | 0.922        | 0.951        | 0.961        | 0.949        | 0.940        | 0.970        | 0.840        |
| MobileNeRF [1]        | 0.935                   | 0.892        | 0.898        | 0.944        | 0.897        | 0.894        | 0.948        | 0.800        |
| MobileNeRF [1] w/o SS | 0.925                   | 0.873        | 0.882        | 0.935        | 0.881        | 0.874        | 0.935        | 0.782        |
| Ours                  | <b>0.971</b>            | <b>0.932</b> | <b>0.969</b> | <b>0.978</b> | <b>0.972</b> | <b>0.945</b> | <b>0.978</b> | <b>0.889</b> |

  

| Method                | Average LPIPS $\downarrow$ |              |              |              |              |              |              |              |
|-----------------------|----------------------------|--------------|--------------|--------------|--------------|--------------|--------------|--------------|
|                       | chair                      | drums        | figus        | hotdog       | lego         | materials    | mic          | ship         |
| SNeRG [2]             | 0.045                      | 0.078        | 0.047        | 0.049        | 0.052        | 0.063        | 0.045        | 0.159        |
| MobileNeRF [1]        | 0.058                      | 0.095        | 0.098        | 0.067        | 0.086        | 0.109        | 0.064        | 0.186        |
| MobileNeRF [1] w/o SS | 0.073                      | 0.121        | 0.115        | 0.085        | 0.106        | 0.146        | 0.095        | 0.205        |
| Ours                  | <b>0.033</b>               | <b>0.068</b> | <b>0.041</b> | <b>0.035</b> | <b>0.030</b> | <b>0.050</b> | <b>0.040</b> | <b>0.113</b> |

Table 1: **Per-scene quantitative results on Multiscale-NeRF.** For quantitative comparison of models trained and evaluated on multiscale dataset. All the metrics of the scene are averaged across four scales.

## 2. Additional Qualitative Results

We first visualize the rendering results evaluated on **Multiscale-NeRF** in Fig. 1. One can observe that training with images at multiple resolution yields a significant challenge to the baseline methods, as the results of SNeRG and MobileNeRF are excessively blurry. In contrast, our method learns the high frequencies in high-resolution images, and render low-frequencies when the resolution is decreased. We also provide the calculated LOD in Fig. 2, for better visibility we scale the low-resolution images to the size of full resolution. We can see that with the decreasing of frame resolution, the LOD is increasing, as the Mip-VoG represents a relatively large region when the sample comes from a relatively small resolution image.

We then provide the rendering results that trained on **Synthetic-NeRF** and evaluated on **Multiscale-NeRF** in Fig. 3 for illustration of anti-aliasing. We can see that MobileNeRF provides the best anti-aliasing effect thanks to supersampling, as in the low-resolution images low frequencies are retained. Our method achieve an admirable anti-aliasing performance, comparing with all the methods without using supersampling. The results suggest that our method provide an effective multiscale representation for real-time application, since it improves both multiscale training and anti-aliasing rendering.

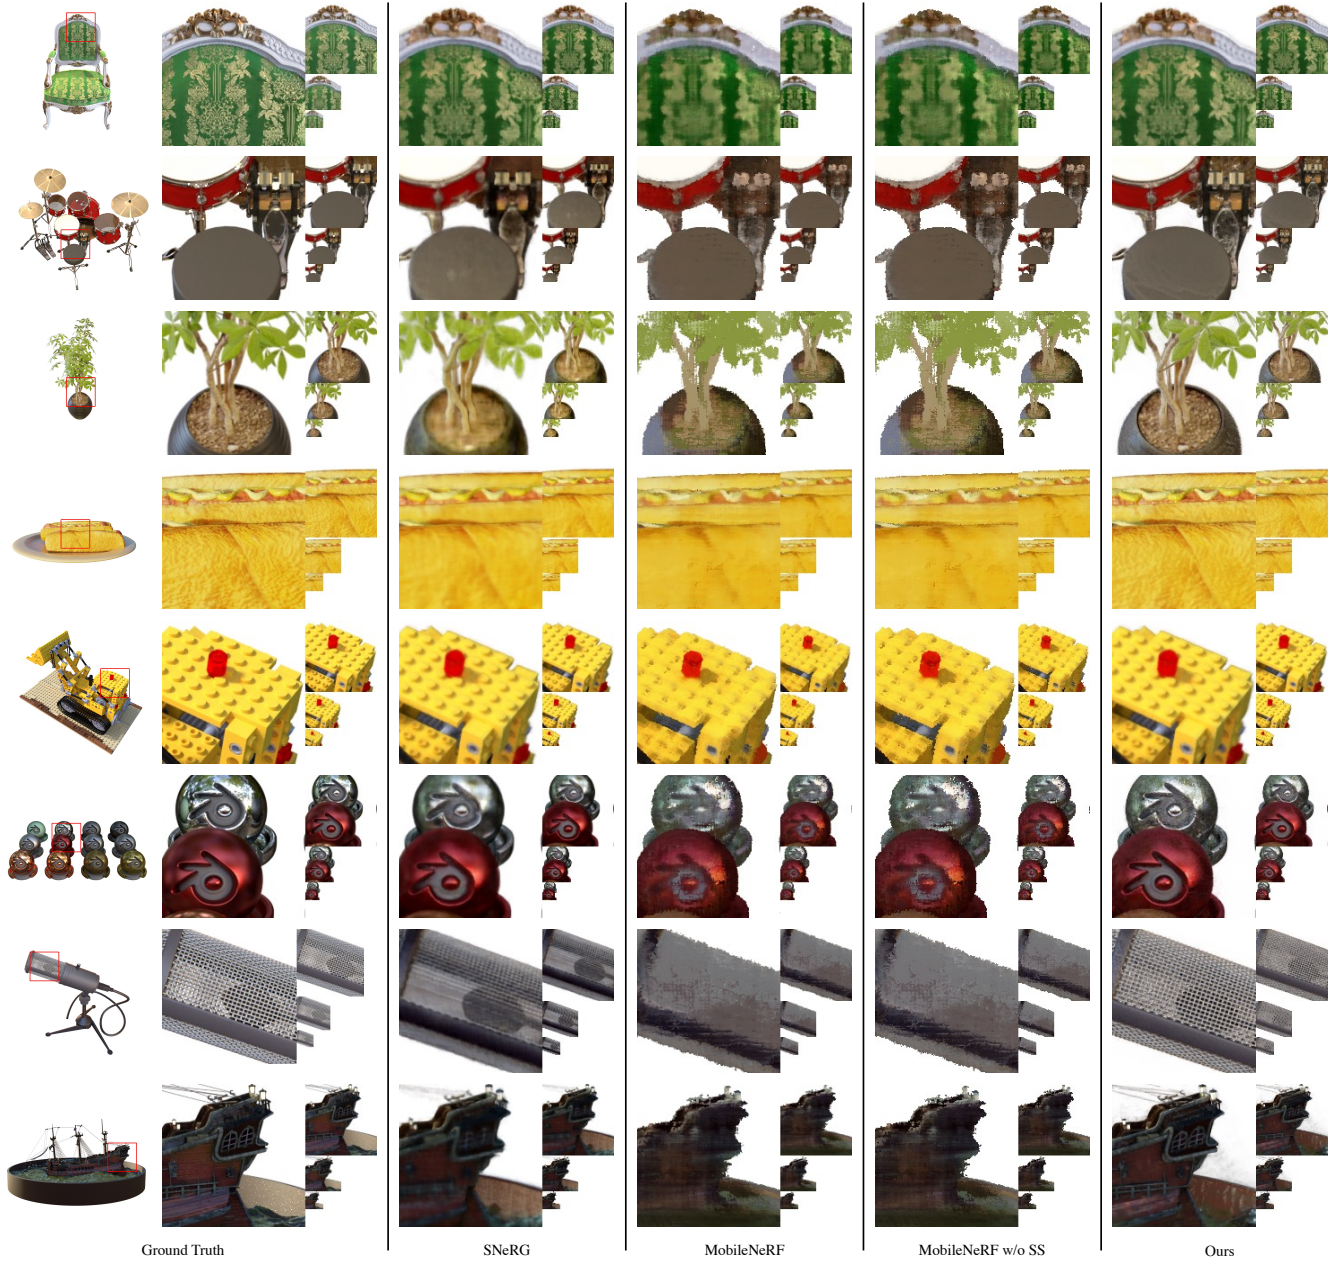

Figure 1: **Multiscale-NeRF**. We demonstrate Mip-VoG rendering results compared to other baselines on the test set from eight scenes, trained and evaluated on multiscale dataset. We visualize a crop region (shown in red box) on a same image at 4 different scales as an image pyramid. MobileNeRF yields over smooth results on all scales, while SNeRG lost high frequencies in high-resolution images and product aliasing in low-resolution frames. Our method surpass the baselines by a large margin as the rendering quality is significantly better.

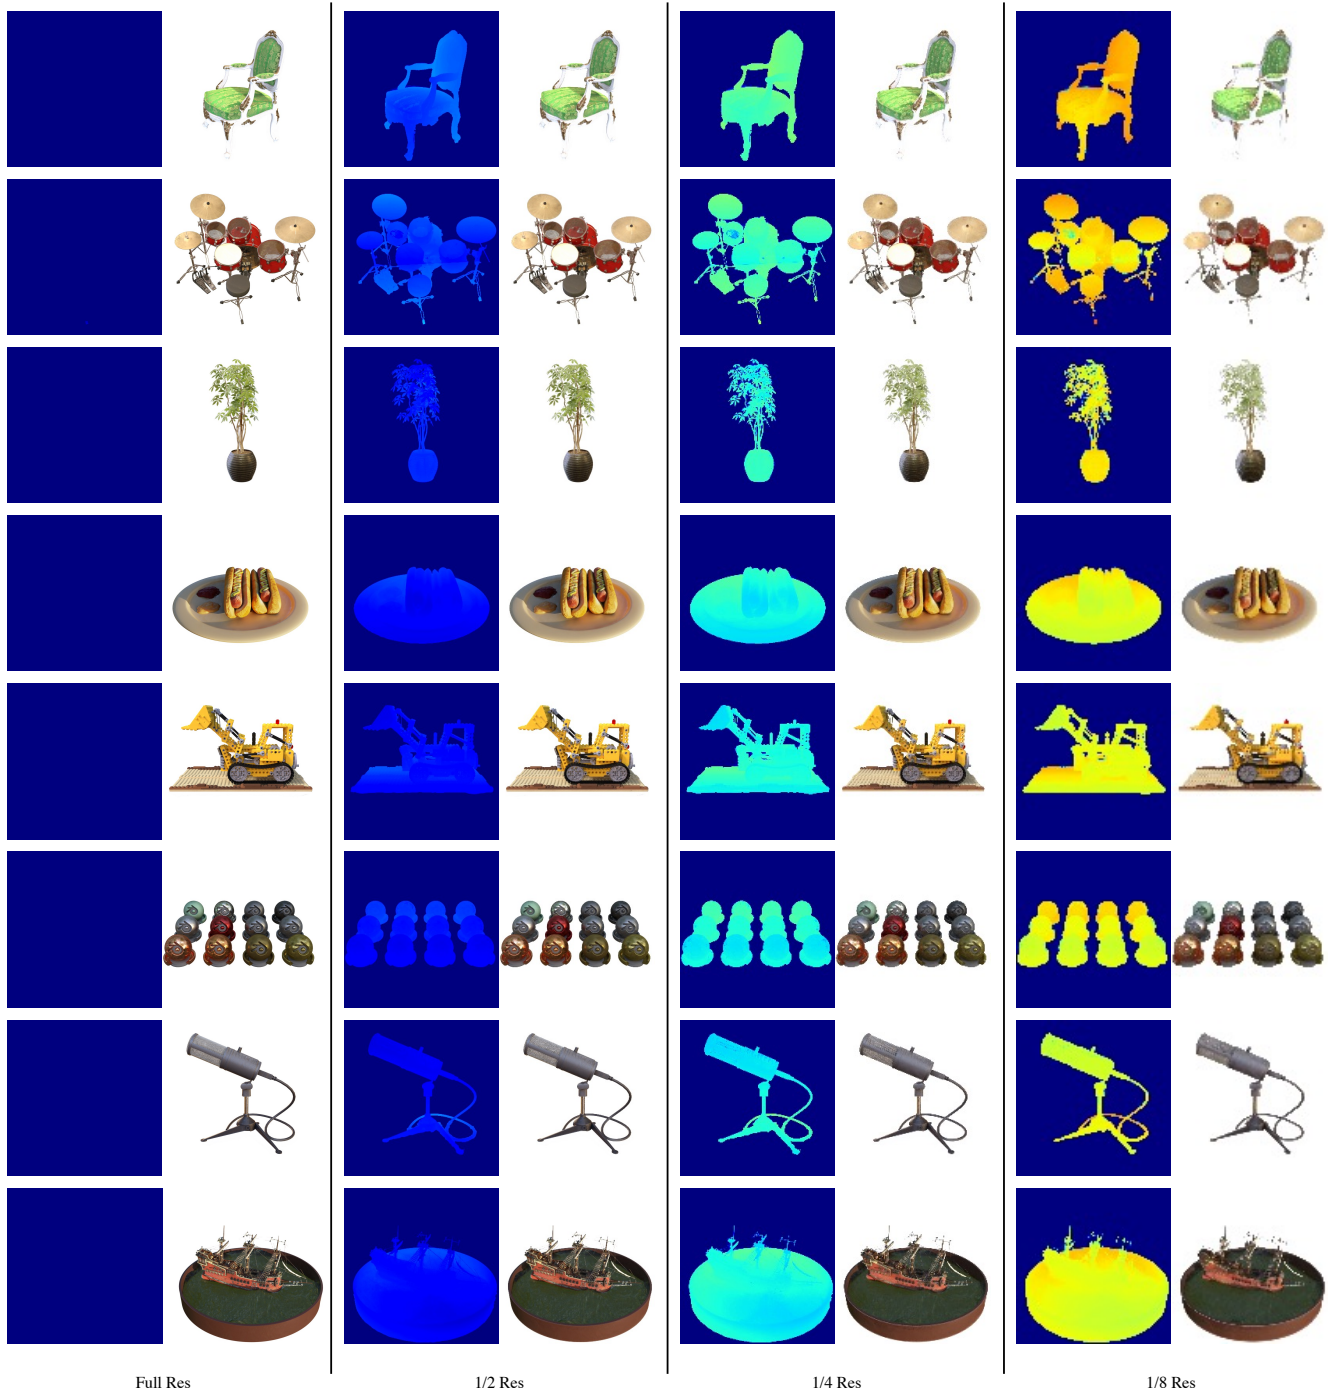

Figure 2: **Visualization of LOD.** We visualize the pixel-wise LOD at four different scales. The value is computed using volume rendering integral of the points' LOD along the ray. The object situated on the left-hand side represents the LOD, while the one positioned on the right-hand side corresponds to our predicted frame. We resized the low-resolution rendered images to match the dimensions of the full resolution images, enhancing visibility and facilitating direct comparison. Brighter color indicates higher value.



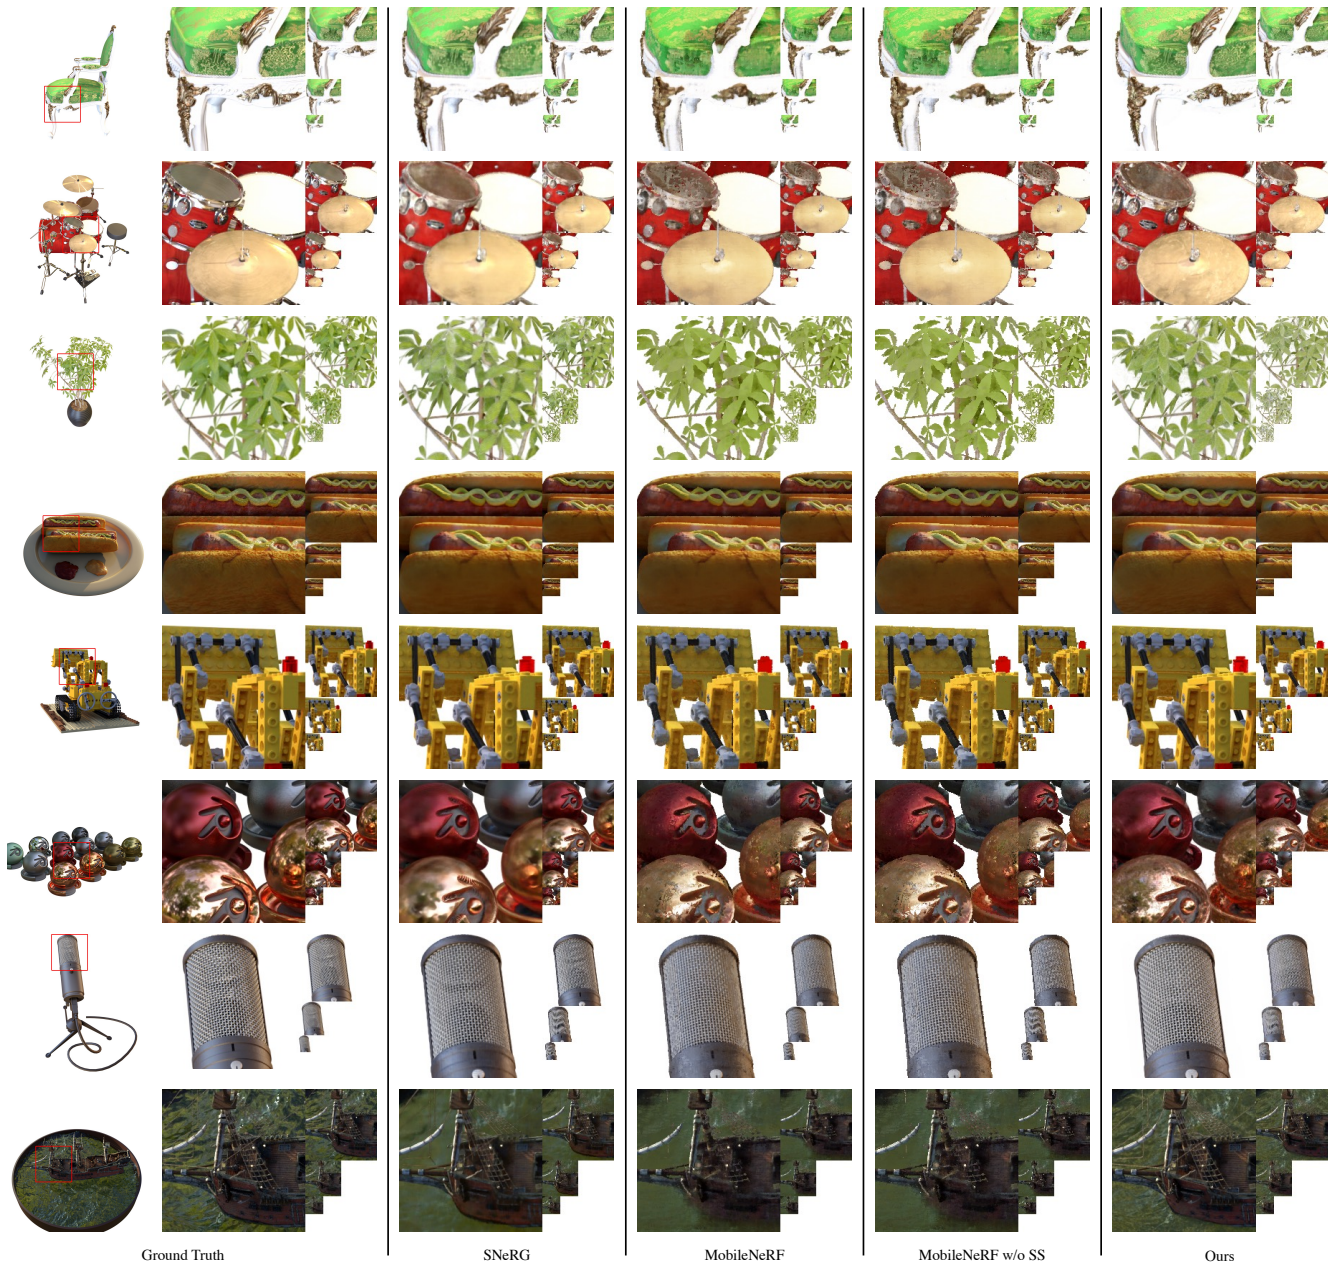

Figure 3: **Synthetic-NeRF**. We demonstrate Mip-VoG rendering results compared to other baselines on the multiscale test set from eight scenes of Multiscale-NeRF, trained on single-scale dataset. We visualize a crop region (shown in red box) on a same image at 4 different scales as an image pyramid. Our method outputs the sharp details on high-resolution images and smooth results on low-resolution images, with regards to the ground truth.

## References

- [1] Zhiqin Chen, Thomas Funkhouser, Peter Hedman, and Andrea Tagliasacchi. Mobilenerf: Exploiting the polygon rasterization pipeline for efficient neural field rendering on mobile architectures. In *The Conference on Computer Vision and Pattern Recognition (CVPR)*, 2023. 1
- [2] Peter Hedman, Pratul P Srinivasan, Ben Mildenhall, Jonathan T Barron, and Paul Debevec. Baking neural radiance fields for real-time view synthesis. In *Proceedings of the IEEE/CVF International Conference on Computer Vision*, pages 5875–5884, 2021. 1
